# Supplementary material for: Prognostic Value of Radiomic Analysis Using Pre- and Post-Treatment 18F-FDG-PET/CT in Patients with Laryngeal Cancer and Hypopharyngeal Cancer
Source: MDPI journal article supplement (doi:10.3390/jpm14010071), 2024-01-05
Supplement: s1 [file s1]

Supplementary Table S1. Radiomics features extracted from <sup>a</sup>CGITA.

| Parent matrix of CGITA   | Feature measure of CGITA  |
|--------------------------|---------------------------|
| Co-occurrence            | Second angular moment     |
| Co-occurrence            | Contrast                  |
| Co-occurrence            | Entropy                   |
| Co-occurrence            | Homogeneity               |
| Co-occurrence            | Dissimilarity             |
| Co-occurrence            | Inverse difference moment |
| Co-occurrence            | Correlation               |
| Normalized Co-occurrence | Second angular moment     |
| Normalized Co-occurrence | Contrast                  |
| Normalized Co-occurrence | Entropy                   |
| Normalized Co-occurrence | Homogeneity               |
| Normalized Co-occurrence | Dissimilarity             |
| Normalized Co-occurrence | Inverse difference moment |
| SUV statistics           | Minimum SUV               |
| SUV statistics           | Maximum SUV               |
| SUV statistics           | Mean SUV                  |
| SUV statistics           | SUV Variance              |
| SUV statistics           | SUV SD                    |
| SUV statistics           | SUV Skewness              |
| SUV statistics           | SUV Kurtosis              |

|                                      |                             |
|--------------------------------------|-----------------------------|
| SUV statistics                       | SUV bias-corrected Skewness |
| SUV statistics                       | SUV bias-corrected Kurtosis |
| SUV statistics                       | TLG                         |
| SUV statistics                       | Tumor volume                |
| SUV statistics                       | Entropy                     |
| SUV statistics                       | SULpeak                     |
| Texture Spectrum                     | Max spectrum                |
| Texture Spectrum                     | Black–white symmetry        |
| Texture Feature Coding               | Coarseness                  |
| Texture Feature Coding               | Homogeneity                 |
| Texture Feature Coding               | Mean convergence            |
| Texture Feature Coding               | Variance                    |
| Texture Feature Coding Co-occurrence | Second angular moment       |
| Texture Feature Coding Co-occurrence | Contrast                    |
| Texture Feature Coding Co-occurrence | Entropy                     |
| Texture Feature Coding Co-occurrence | Homogeneity                 |
| Texture Feature Coding Co-occurrence | Intensity                   |
| Texture Feature Coding Co-occurrence | Inverse difference moment   |
| Texture Feature Coding Co-occurrence | Code Entropy                |
| Texture Feature Coding Co-occurrence | Code Similarity             |

<sup>a</sup>CGITA : Chang-Gung Image Texture Analysis

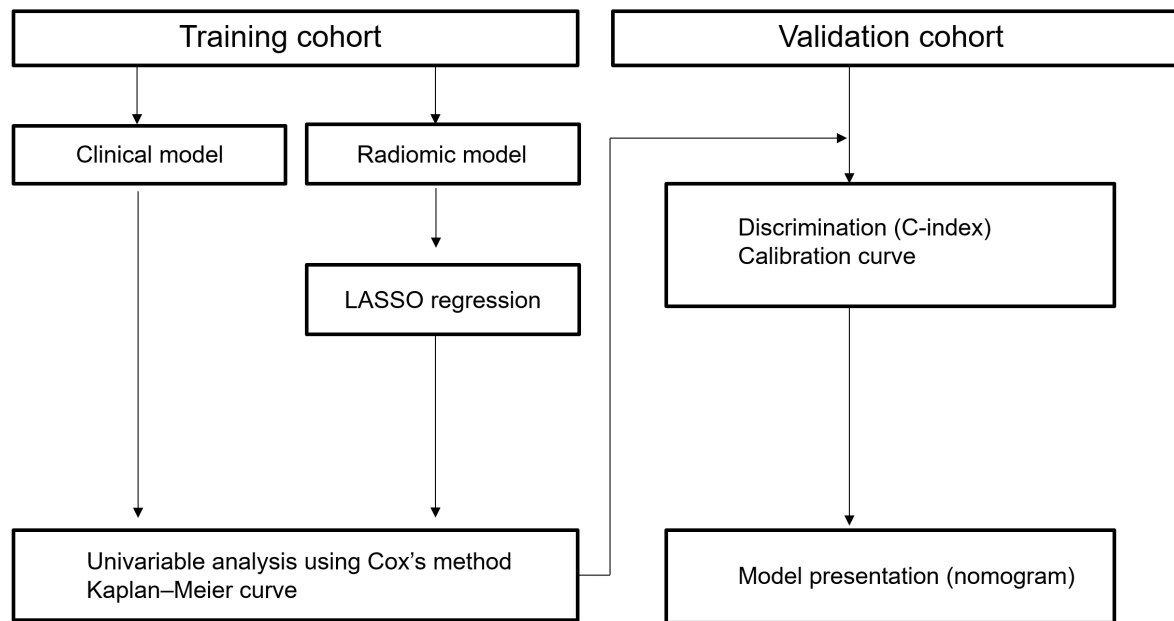

Supplementary Figure S1. Flow chart of the study design.

Predicting PFS:

Rad-score

= Normalized\_Cooccurrence\_Second\_angular\_moment \* 0.0015226635

+ Cooccurrence\_Correlation \* 0.0091515752

+ SUV\_statistics\_SUV\_Variance \* 0.0031195177

Predicting OS:

Rad-score

= Cooccurrence\_Contrast \*-0.0041757495

+ SUV\_statistics\_SUV\_Variance \* 0.0013239587

+ SUV\_statistics\_SUV\_Kurtosis \*-0.0015628803

+ SUV\_statistics\_SUV\_bias\_corrected\_Skewness \* 0.0006349189

+ Texture\_Feature\_Coding\_Cooccurrence\_Second\_angular\_moment \* 0.0005972383

Supplementary Figure S2. Rad-score formula.

Supplementary Table S2. The clinical data of risk-stratified groups according to <sup>a</sup>PFS model in training set.

| Characteristic               | Low-risk group<br>(n=54) | High-risk group (n = 7) | p     |
|------------------------------|--------------------------|-------------------------|-------|
| Mean age, y                  | 61.46 ± 9.24             | 60.41 ± 12.50           | 0.785 |
| Sex                          |                          |                         | 0.405 |
| male                         | 49 (91%)                 | 7 (100%)                |       |
| female                       | 5 (9%)                   | 0 (0%)                  |       |
| Smoking history              |                          |                         | 0.347 |
| Ex/current smoker            | 46 (85%)                 | 7 (100%)                |       |
| Never smoked                 | 6 (12%)                  | 0 (0%)                  |       |
| N/A                          | 2 (3%)                   | 0 (0%)                  |       |
| Cancer site                  |                          |                         | 0.178 |
| Larynx                       | 32 (59%)                 | 6 (86%)                 |       |
| Hypopharynx                  | 22 (41%)                 | 1 (14%)                 |       |
| Concurrent chemoradiotherapy |                          |                         | 0.148 |
| Yes                          | 38 (70%)                 | 3 (43%)                 |       |
| No                           | 16 (30%)                 | 4 (57%)                 |       |
| Induction chemotherapy       |                          |                         | 0.460 |
| Yes                          | 4 (7%)                   | 0 (0%)                  |       |
| No                           | 50 (93%)                 | 7 (100%)                |       |
| T stage                      |                          |                         | 0.607 |

|                    |          |         |       |
|--------------------|----------|---------|-------|
| T1                 | 8 (15%)  | 3 (43%) |       |
| T2                 | 26 (48%) | 2 (29%) |       |
| T3                 | 14 (26%) | 0 (0%)  |       |
| T4                 | 6 (11%)  | 2 (29%) |       |
| N stage            |          |         | 0.536 |
| N0                 | 25 (46%) | 5 (71%) |       |
| N1                 | 16 (30%) | 0 (0%)  |       |
| N2                 | 13 (24%) | 2 (29%) |       |
| N3                 | 0 (0%)   | 0 (0%)  |       |
| No. of progression |          |         | 0.030 |
| Yes                | 16 (30%) | 5 (71%) |       |
| No                 | 38 (70%) | 2 (29%) |       |

<sup>a</sup>PFS: progression-free survival.

Supplementary Table S3. The clinical data of risk-stratified groups according to <sup>b</sup>OS model in training set.

| Characteristic               | Low-risk group (n=52) | High-risk group (n = 9) | P     |
|------------------------------|-----------------------|-------------------------|-------|
| Mean age, y                  | 60.78 ± 9.46          | 64.58 ± 9.95            | 0.274 |
| Sex                          |                       |                         | 0.732 |
| male                         | 48 (92%)              | 8 (89%)                 |       |
| female                       | 4 (8%)                | 1 (11%)                 |       |
| Smoking history              |                       |                         | 0.198 |
| Ex/current smoker            | 46 (88%)              | 7 (78%)                 |       |
| Never smoked                 | 4 (8)                 | 2 (12%)                 |       |
| N/A                          | 2 (4%)                | 0 (0%)                  |       |
| Cancer site                  |                       |                         | 0.654 |
| Larynx                       | 33 (63%)              | 5 (56%)                 |       |
| Hypopharynx                  | 19 (37%)              | 4 (44%)                 |       |
| Concurrent chemoradiotherapy |                       |                         | 0.468 |
| Yes                          | 34 (65%)              | 7 (78%)                 |       |
| No                           | 18 (35%)              | 2 (22%)                 |       |
| Induction chemotherapy       |                       |                         | 0.553 |
| Yes                          | 3 (6%)                | 1 (11%)                 |       |
| No                           | 49 (94%)              | 8 (89%)                 |       |
| T stage                      |                       |                         | 0.042 |

|              |          |         |       |
|--------------|----------|---------|-------|
| T1           | 10 (19%) | 1 (12%) |       |
| T2           | 26 (50%) | 2 (22%) |       |
| T3           | 11 (21%) | 3 (33%) |       |
| T4           | 5 (10%)  | 3 (33%) |       |
| N stage      |          |         | 0.336 |
| N0           | 26 (50%) | 4 (44%) |       |
| N1           | 15 (29%) | 1 (12%) |       |
| N2           | 11 (21%) | 4 (44%) |       |
| N3           | 0 (0%)   | 0 (0%)  |       |
| No. of death |          |         | 0.032 |
| Yes          | 11 (21%) | 5 (56%) |       |
| No           | 41 (79%) | 4 (44%) |       |

<sup>b</sup>OS: overall survival.
